# Supplementary material
Source: publisher figshare collection journal article supplement (https://acs.figshare.com/ndownloader/files/9181132)
Supplement: Supplementary file 1 [file 9181132]

# Supporting Information

## Ordered Mesoporous NiCo<sub>2</sub>O<sub>4</sub> Nanospheres as a Novel Electrocatalyst Platform for 1-Naphthol and 2-Naphthol Individual Sensing Application

Jiangjiang Zhang,<sup>†</sup> Qianwen Mei,<sup>‡</sup> Yaping Ding,<sup>\*,‡</sup> Kai Guo,<sup>†</sup> Xinxin Yang,<sup>\*,†</sup> Jingtai Zhao <sup>\*,†,§</sup>

<sup>†</sup> School of Materials Science and Engineering, Shanghai University, Shanghai 200444, People's Republic of China

<sup>‡</sup> Department of Chemistry, College of Sciences, Shanghai University, Shanghai 200444, People's Republic of China

<sup>§</sup> State Key Laboratory of Advanced Special Steel, Shanghai University, Shanghai 200444, People's Republic of China

### Corresponding Author

\* E-mail: [jtzhao@shu.edu.cn](mailto:jtzhao@shu.edu.cn) (J.T.Z)

\* E-mail: [wdingyp@sina.com](mailto:wdingyp@sina.com) (Y.P.D)

\* E-mail: [yangxinxin@shu.edu.cn](mailto:yangxinxin@shu.edu.cn) (X.X.Y)

## S.1 Syntheses and characterizations of KIT-6 hard template:

The KIT-6 is composed of the interconnected cylindrical pore channels with the cubic  $Ia\bar{3}d$  space group to form ordered mesoporous nanosphere. From Fig.S3, the KIT-6 shows a very narrow pore size distribution centered at 7.4 nm. The specific surface area of KIT-6 is  $738 \text{ m}^2 \text{ g}^{-1}$ . After nanocasting strategy and a calcination process, meso- $\text{NiCo}_2\text{O}_4$  nanosphere retained a cubic  $Ia\bar{3}d$  mesoporous architecture similar to that of the original silica template. Meso- $\text{NiCo}_2\text{O}_4$  nanosphere was inverted with respect to the silica template.

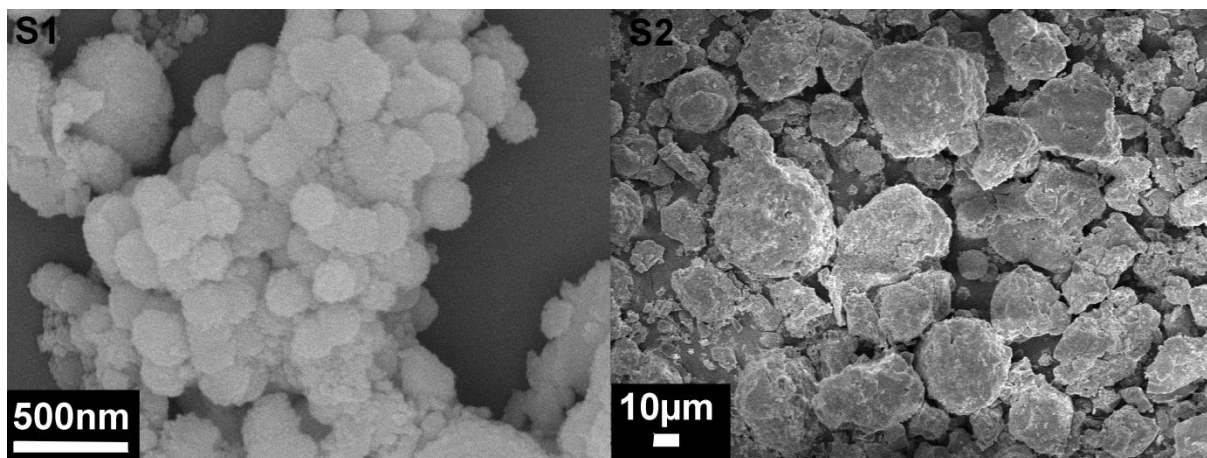

**Fig. S1** SEM image of KIT-6 nanospheres.

**Fig. S2** SEM image of bulk- $\text{NiCo}_2\text{O}_4$ .

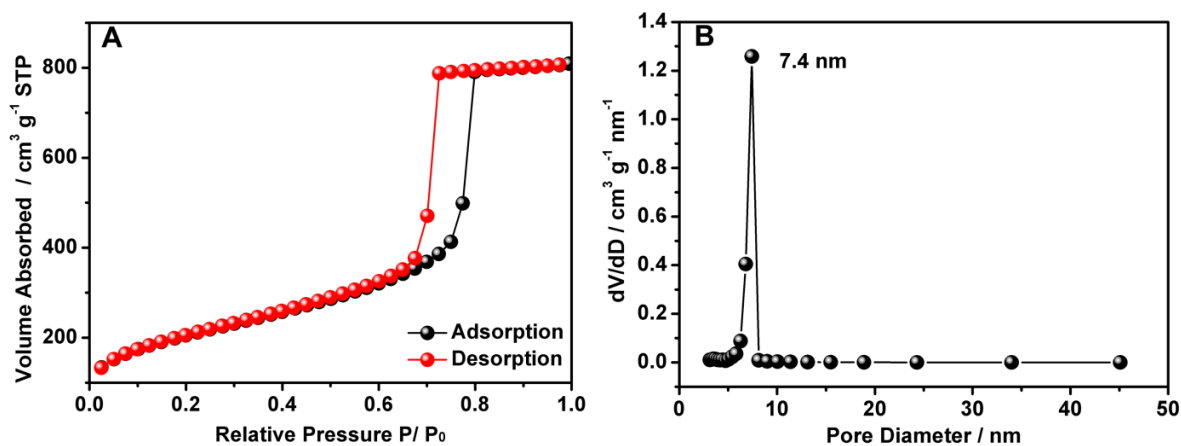

**Fig. S3** (A) N<sub>2</sub> adsorption-desorption isotherm curve and (B) Pore-size distribution of KIT-6.

## **S.2 Optimization of the detection conditions**

### **Effects of the applied potential and concentration of modifier**

To improve the electrocatalytic performance of meso-NiCo<sub>2</sub>O<sub>4</sub> / CPE towards 1-NAP and 2-NAP, effecton factors were optimized, including the applied potential and the concentration of modifier. The applied potential is a key factor influencing the performance of the 1-NAP and 2-NAP sensors. Fig. S5 A and B illustrate the effecton of the applied potential varying from +0.3 to +0.7 V on the response current of 4 μM 1-NAP and 2-NAP, respectively. The peak current response increased with the increment of applied potential from +0.3 to +0.4 V, and then decreased at potential +0.4 V. Therefore, potential of +0.4 V was chosen for further experiments of 1-NAP detection. Similarly, potential of +0.6 V was chosen for further experiments of 2-NAP detection.

Fig. S4 C and D show the effecton of meso-NiCo<sub>2</sub>O<sub>4</sub> concentration on the amperometric response of 4 μM 1-NAP and 2-NAP, respectively. The current response increased rapidly upon the increase of meso-NiCo<sub>2</sub>O<sub>4</sub> from 1.0 to 2.0 mg/mL, and then decreased with concentration shifting from 2.0 to 3.0 mg/mL. Thus, 2.0 mg/mL meso-NiCo<sub>2</sub>O<sub>4</sub> was selected for the amperometric detection of 1-NAP and 2-NAP.

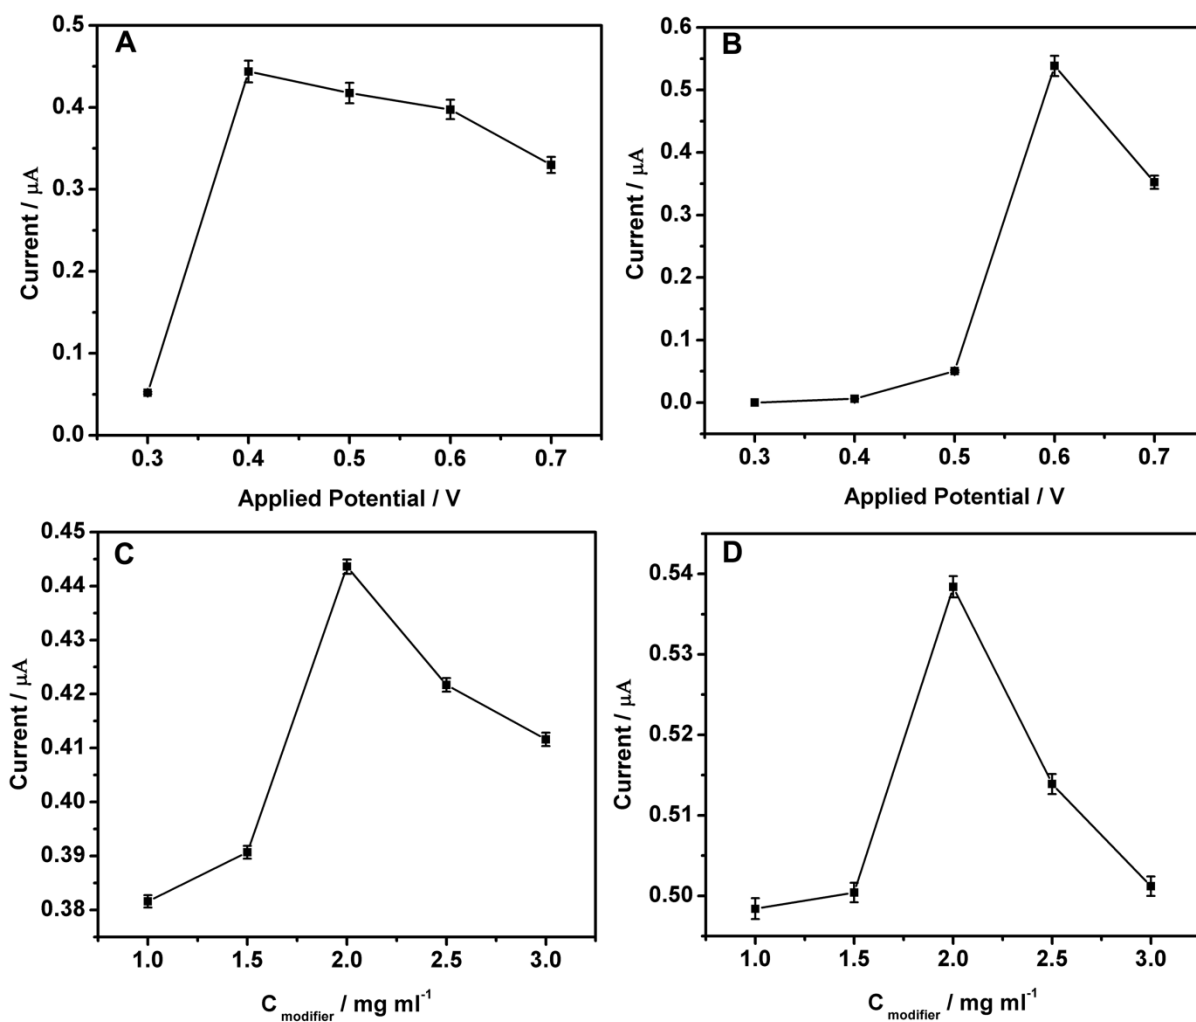

**Fig. S4** Effects of optimization of the detection conditions on the amperometric response of 4  $\mu\text{M}$  1-NAP and 2-NAP, respectively: (A, B) applied potential; (C, D) concentration of meso- $\text{NiCo}_2\text{O}_4$ .

### The selectivity of meso-NiCo<sub>2</sub>O<sub>4</sub> / CPE for NAP detection

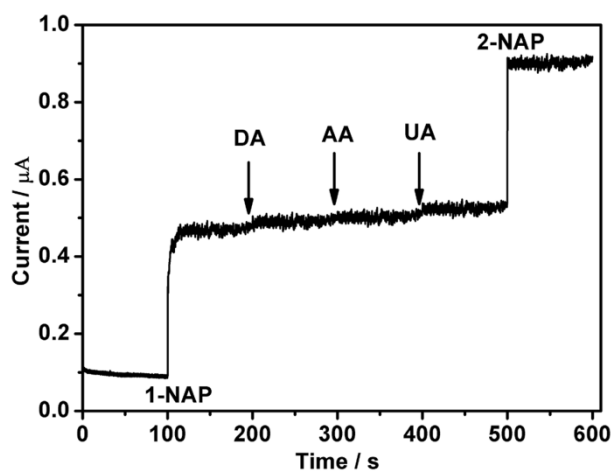

**Fig. S5** Amperometric response curve of 4  $\mu\text{M}$  1-NAP and 2-NAP on meso-NiCo<sub>2</sub>O<sub>4</sub> / CPE in the presence of 4  $\mu\text{M}$  different interfering species in 0.1 M PBS electrolyte at the applied potential of 0.5 V.
